# Supplementary material
Source: publisher figshare collection journal article supplement (https://geolsoc.figshare.com/ndownloader/files/28810775)
Supplement: Supplementary file 1 [file 28810775]

## Sheet: Sulfur speciation
Core	Depth, cm bsf	[AVS], mg/kg	[CRS], mg/kg	[ZVS], mg/kg
GeoB5801-4A	1	0	13.3278	1.68678
GeoB5801-4A	3	0.715516	10.1592	0
GeoB5801-4A	5	0.552238	23.0099	0.99608
GeoB5801-4A	7	0.539654	19.8323	1.02473
GeoB5801-4A	9	0.863348	27.8745	1.60063
GeoB5801-4A	11	0.911383	15.2768	1.97883
GeoB5801-4A	13	0.518957	32.081	1.53873
GeoB5801-4A	15	0	36.8195	1.21268
GeoB5801-4A	17	0	71.0119	1.30231
GeoB5801-4A	19	0.932348	55.2669	1.06497
GeoB5801-4A	21	0.532238	22.2596	2.88958
GeoB5801-4A	23	0.516312	50.5088	0.804665
GeoB5801-4A	25	1.45846	58.6494	1.49421
GeoB5801-4A	27	0.616751	40.6881	0.798609
GeoB5801-4A	29	0	72.2993	1.02686
GeoB5801-4A	31	0	178.133	0.985525
GeoB5801-4A	33	0	36.3768	3.49372
GeoB5801-4A	35	0	72.2603	1.09911
GeoB5801-4A	37	0	105.058	2.85724
GeoB5801-4A	39	0	95.3959	1.87256
GeoB5801-4A	41	0	135.521	3.19019
GeoB5801-4A	43	0.56173	166.946	1.73357
GeoB5801-4A	45	1.33784	92.2851	2.28949
GeoB5801-4A	47	0	59.9888	1.91138
GeoB5801-4A	49	0	52.4894	1.0007
GeoB5806-1A	1	0	25.1982	0.720035
GeoB5806-1A	3	0.831973	5.58062	1.16227
GeoB5806-1A	5	0	25.7922	0.932502
GeoB5806-1A	7	0	10.0315	2.63416
GeoB5806-1A	9	0	28.7058	3.7296
GeoB5806-1A	11	0	14.5454	0.798147
GeoB5806-1A	13	0	32.6079	0.987444
GeoB5806-1A	15	0	1.38793	1.03265
GeoB5806-1A	17	0	18.062	1.2633
GeoB5806-1A	19	0	26.5788	1.08578
GeoB5806-1A	21	0	21.538	1.28553
GeoB5806-1A	23	0	26.7834	1.44971
GeoB5806-1A	25	0.573994	12.393	1.01733
GeoB5806-1A	27	0.612443	53.6343	1.55261
GeoB5806-1A	29	0	59.0673	1.07992
GeoB5806-1A	31	1.1855	28.1226	0.929216
GeoB5806-1A	33	1.1713	23.6211	1.96452
GeoB5806-1A	35	1.37629	38.0775	1.32291
GeoB5806-1A	37	1.2059	61.2124	1.43438
GeoB5836-2	1	0.5409	706.471	6.13589
GeoB5836-2	3	2.37101	1984.65	11.8701
GeoB5836-2	5	1.34723	2209.21	62.5104
GeoB5836-2	7	5.20783	3019.86	8.9469
GeoB5836-2	9	2.88948	1752.64	7.96504
GeoB5836-2	11	2.19489	2164.49	57.2336
GeoB5836-2	13	7.93072	1924.84	121.381
GeoB5836-2	15	7.25533	4237.13	68.7988
GeoB5836-2	17	4.12025	4169.32	12.511
GeoB5836-2	19	6.32223	1976.56	12.011
GeoB5836-2	21	5.17266	2681.67	51.2249
GeoB5836-2	23	4.48772	3883.33	188.292
GeoB5836-2	25	1.7111	3962.25	97.2895
GeoB5836-2	27	3.49512	356.313	31.5774
GeoB5836-2	29	2.21674	2258.3	7.67793
GeoB5836-2	31	5.16518	8267.75	9.89125
GeoB5836-2	33	4.57478	3749.58	107.334
GeoB5836-2	35	1.30844	718.585	16.1177
GeoB5836-2	37	2.49006	1907.8	51.8398
GeoB5836-2	39	4.2253	9034.13	16.933
GeoB5836-2	41	5.5371	10518.9	8.63758
GeoB5844-1	0.5	0	0	1.612
GeoB5844-1	1.5	1.7608	0.53234	1.59129
GeoB5844-1	2.5	0.725084	0.930743	1.72631
GeoB5844-1	3.5	1.03426	1.91406	1.97705
GeoB5844-1	4.5	1.14243	0.44713	2.46029
GeoB5844-1	5.5	3.86294	0.789932	1.18609
GeoB5844-1	6.5	1.06716	0	1.57632
GeoB5844-1	7.5	0	0.520938	1.19184
GeoB5844-1	8.5	1.11061	0.597773	1.36214
GeoB5844-1	9.5	0	0.912281	1.68278
GeoB5844-1	10.5	0	0.732159	3.28884
GeoB5844-1	11.5	1.19152	0.665845	1.00833
GeoB5844-1	12.5	0	0.495242	1.16828
GeoB5844-1	13.5	0.814722	1.62689	1.22605
GeoB5844-1	14.5	0	0.91084	1.47041
GeoB5844-1	15.5	0	1.3316	1.35969
GeoB5844-1	16.5	0.73779	1.17274	1.21202
GeoB5844-1	17.5	0.542499	0	1.00612
GeoB5844-1	18.5	0.837109	0	1.38101
GeoB5844-1	20.5	0.678535	0.829024	1.56703
GeoB5844-1	21.5	0	0.933298	1.14983
GeoB5844-1	22.5	0.665875	1.60405	2.91543
GeoB5844-1	23.5	0	1.33827	2.09093
GeoB5844-1	24.5	0.520807	3.08376	1.21366
GeoB5844-1	25.5	0.993173	0.650183	2.06016
GeoB5844-1	26.5	0.82452	0	1.96525
GeoB5844-1	27.5	0.663923	1.01302	1.49105
GeoB5844-1	28.5	1.13127	0	1.09155
GeoB5844-1	29.5	1.90892	0.911272	1.11789

## Sheet: Iron Speciation
Core	Depth, cm bsf	[Fetot], g/kg	[FeSB], g/kg	[Feac], g/kg	[Fehydr], g/kg	[Fedith], g/kg	[Feox], g/kg
GeoB5801-4A	1	39.0787	0.0116296	0.172478	1.15667	7.77426	2.50349
GeoB5801-4A	3	38.0081	0.0101134	0.301148	1.23758	9.14967	6.73522
GeoB5801-4A	5	32.2337	0.0210417	0.25592	0.741393	8.46561	2.02565
GeoB5801-4A	7	55.1053	0.018247	0.277152	0.278568	6.72552	2.24796
GeoB5801-4A	9	44.1059	0.0258294	0.248815	0.403605	4.14548	1.13304
GeoB5801-4A	11	39.8991	0.0149207	0.195965	0.847376	5.58087	1.54644
GeoB5801-4A	13	34.5797	0.0288988	0.271366	0.65927	5.40471	1.7203
GeoB5801-4A	15	36.6002	0.0321279	0.19239	0.657296	7.13181	1.74879
GeoB5801-4A	17	36.0258	0.0619634	0.213056	0.559703	7.72393	2.024
GeoB5801-4A	19	35.1229	0.0498518	0.22781	0.512425	5.117	1.67869
GeoB5801-4A	21	51.3958	0.0203521	0.159363	0.672289	7.07475	1.84754
GeoB5801-4A	23	38.4522	0.0449739	0.235452	1.17466	7.38784	5.37879
GeoB5801-4A	25	34.3317	0.0537214	0.288563	1.16942	9.66142	1.45884
GeoB5801-4A	27	39.9133	0.0365799	0.206664	0.522291	9.38148	1.63846
GeoB5801-4A	29	49.2388	0.0630868	0.19178	0.458444	6.20262	1.49632
GeoB5801-4A	31	33.1868	0.155435	0.131036	0.549392	4.56166	1.13658
GeoB5801-4A	33	32.6514	0.0317416	0.262442	0.997435	6.29474	1.52712
GeoB5801-4A	35	37.8902	0.0630528	0.28317	0.761721	5.78267	1.75052
GeoB5801-4A	37	40.198	0.0916715	0.236002	0.875579	6.98983	1.95542
GeoB5801-4A	39	32.3074	0.0832404	0.324451	1.05169	7.57499	1.92444
GeoB5801-4A	41	49.7235	0.118253	0.32258	1.82076	5.63635	1.64228
GeoB5801-4A	43	39.8513	0.146654	0.358409	1.32435	5.68514	1.83855
GeoB5801-4A	45	43.2435	0.0828607	0.309071	1.07997	8.62622	2.25311
GeoB5801-4A	47	33.1733	0.0523449	0.243659	0.713607	7.71529	1.65545
GeoB5801-4A	49	39.4559	0.0458011	0.30489	0.997153	6.07007	1.52379
GeoB5806-1A	1	42.8141	0.0219874	0.0788949	0.925876	7.08966	1.17463
GeoB5806-1A	3	54.047	0.00632145	0.102955	0.516058	12.7725	0.949517
GeoB5806-1A	5	30.543	0.0225057	0.0546732	0.255056	3.53769	0.731914
GeoB5806-1A	7	22.5325	0.00875324	0.143503	0.608687	8.89181	1.90428
GeoB5806-1A	9	29.4409	0.025048	0.138864	0.500794	17.244	1.70328
GeoB5806-1A	11	22.4133	0.012692	0.132803	0.437343	5.20839	1.67161
GeoB5806-1A	13	20.837	0.0284529	0.191726	0.726575	7.42679	1.73823
GeoB5806-1A	15	24.1868	0.00121107	0.182664	0.744479	8.07185	1.39385
GeoB5806-1A	17	18.1447	0.0157605	0.144977	0.470526	7.03633	3.07026
GeoB5806-1A	19	35.8301	0.0231921	0.123724	0.50925	6.09981	1.13194
GeoB5806-1A	21	31.6072	0.0187935	0.191203	0.596903	9.04075	1.61505
GeoB5806-1A	23	36.7718	0.0233707	0.273321	0.620727	6.27071	1.15504
GeoB5806-1A	25	38.548	0.0118156	0.301447	0.129296	8.81228	1.75563
GeoB5806-1A	27	31.8537	0.047869	0.359721	0.624243	6.04074	1.46149
GeoB5806-1A	29	25.5315	0.0515408	0.195011	0.362661	7.18864	1.35701
GeoB5806-1A	31	45.2203	0.026608	0.244027	1.06457	6.48288	1.40933
GeoB5806-1A	33	39.8408	0.0226554	0.238843	0.6733	5.5868	1.89639
GeoB5806-1A	35	36.0608	0.0356274	0.259664	0.904111	7.17389	1.69014
GeoB5806-1A	37	39.1139	0.055517	0.237115	0.362096	6.64202	1.38926
GeoB5836-2	1	27.6237	0.617395	0.69125	1.13815	0.336107	0.477383
GeoB5836-2	3	19.4876	1.7359	0.759448	1.97243	0.447574	0.611249
GeoB5836-2	5	19.3613	1.93006	0.273971	0.927314	0.307143	0.219381
GeoB5836-2	7	15.3555	2.64415	0.323603	0.911168	0.352782	0.27027
GeoB5836-2	9	34.8961	1.53436	0.290438	3.82991	0.433163	0.293404
GeoB5836-2	11	20.4505	1.89251	0.223954	1.14222	0.509029	0.328745
GeoB5836-2	13	20.6383	1.69342	0.194484	2.19313	0.246001	0.257088
GeoB5836-2	15	19.8201	3.70988	0.268963	2.61709	0.516463	0.299819
GeoB5836-2	17	21.7702	3.64524	0.246103	1.41294	0.31226	0.269809
GeoB5836-2	19	15.7942	1.73574	0.305043	2.47865	0.577698	0.305306
GeoB5836-2	21	32.9504	2.34899	0.178903	1.15244	0.419842	0.195457
GeoB5836-2	23	17.1066	3.39634	0.317515	1.16399	0.281516	2.76695
GeoB5836-2	25	15.1126	3.46036	0.145738	0.688906	0.282636	0.136318
GeoB5836-2	27	12.0716	0.317011	0.063323	0.382878	0.225433	0.189472
GeoB5836-2	29	27.772	1.97442	0.150593	0.804244	0.281186	0.196998
GeoB5836-2	31	26.2848	7.22327	0.127843	0.977508	0.308502	0.157868
GeoB5836-2	33	23.1784	3.27978	0.261387	0.748183	0.229376	0.19063
GeoB5836-2	35	18.1281	0.629305	0.0665411	0.31968	0.186357	0.155501
GeoB5836-2	37	20.7779	1.66905	0.127131	0.871674	0.205154	0.157692
GeoB5836-2	39	5.35474	7.89036	0.133047	0.778794	0.378129	0.156396
GeoB5836-2	41	21.6713	9.1882	0.0502335	1.12559	0.186048	0.136575
GeoB5844-1	0.5	26.1718	0	0.0626066	0.982374	3.05297	0.714038
GeoB5844-1	1.5	32.1245	0.00353739	0.0265387	0.700292	2.92936	0.653381
GeoB5844-1	2.5	30.2643	0.00207753	0.027801	0.537689	3.84457	0.477132
GeoB5844-1	3.5	34.1581	0.00347512	0.0314779	6.06467	3.19749	0.611823
GeoB5844-1	4.5	30.1982	0.00238387	0.0360844	0.764177	2.82246	0.935246
GeoB5844-1	5.5	32.731	0.00743071	0.0237386	0.517501	3.13001	0.54695
GeoB5844-1	6.5	27.1719	0.00186236	0.0205825	0.389309	2.64738	0.744809
GeoB5844-1	7.5	28.0318	0.000454559	0.00133968	0.0315888	0.172735	0.0440341
GeoB5844-1	8.5	27.5405	0.00245979	0.0283656	0.565131	3.37872	0.42601
GeoB5844-1	9.5	23.5054	0.000796037	0.0213191	0.367154	3.83837	0.46627
GeoB5844-1	10.5	29.6515	0.000638866	0.0212124	0.762723	4.53453	0.431183
GeoB5844-1	11.5	26.5872	0.00266039	0.0226584	0.462621	3.0479	0.43751
GeoB5844-1	12.5	23.9689	0.000432137	0.025376	0.309139	1.50203	0.40305
GeoB5844-1	13.5	28.8914	0.00284141	0.0208873	0.888127	3.05046	0.733069
GeoB5844-1	14.5	26.2626	0.000794779	0.0185834	0.705458	2.84159	0.567017
GeoB5844-1	15.5	26.3648	0.00116193	0.0221837	0.451955	2.89206	0.547402
GeoB5844-1	16.5	15.4623	0.00231087	0.025411	1.31068	4.72547	0.546606
GeoB5844-1	17.5	23.1216	0.000946745	0.0175544	0.514397	3.17675	0.421191
GeoB5844-1	18.5	33.2338	0.00146089	0.0216876	0.491172	2.90864	0.348591
GeoB5844-1	20.5	27.0573	0.00190754	0.031704	0.525289	4.48921	0.357006
GeoB5844-1	21.5	28.4713	0.000814375	0.0206186	0.835518	4.7721	0.511279
GeoB5844-1	22.5	30.9081	0.00256172	0.0308202	0.49919	4.31263	0.639444
GeoB5844-1	23.5	30.2492	0.00116775	0.0368921	0.300547	3.08985	0.437706
GeoB5844-1	24.5	27.6983	0.00359971	0.0440154	0.344494	2.37142	0.466666
GeoB5844-1	25.5	31.3229	0.00230058	0.0702826	0.699545	3.5215	0.695596
GeoB5844-1	26.5	38.1525	0.00143892	0.115698	0.448059	3.05669	0.715434
GeoB5844-1	27.5	27.9177	0.00204259	0.0731296	0.484868	4.94781	0.431559
GeoB5844-1	28.5	18.7109	0.00197424	0.0696141	0.513512	4.6337	0.397025
GeoB5844-1	29.5	23.837	0.00412652	0.0377523	0.383808	2.02218	0.466469

## Sheet: Sulfur isotope composition
Core	Depth, cm bsf	δ34S, sulfate, ‰	δ34S, CRS, ‰	Δ33S, sulfate, ‰	Δ33S, CRS, ‰
GeoB5801-4A	1
GeoB5801-4A	3
GeoB5801-4A	5
GeoB5801-4A	7
GeoB5801-4A	9
GeoB5801-4A	11
GeoB5801-4A	13
GeoB5801-4A	15
GeoB5801-4A	17	17.127		-0.00712943
GeoB5801-4A	19	12.98		0.00796181
GeoB5801-4A	21
GeoB5801-4A	23
GeoB5801-4A	25
GeoB5801-4A	27
GeoB5801-4A	29
GeoB5801-4A	31		-39.02		0.077
GeoB5801-4A	33
GeoB5801-4A	35
GeoB5801-4A	37	8.13		0.0019
GeoB5801-4A	39
GeoB5801-4A	41
GeoB5801-4A	43		-41.758		0.0526111
GeoB5801-4A	45
GeoB5801-4A	47
GeoB5801-4A	49	21.4606		0.0293647
GeoB5806-1A	1
GeoB5806-1A	3
GeoB5806-1A	5
GeoB5806-1A	7
GeoB5806-1A	9
GeoB5806-1A	11
GeoB5806-1A	13
GeoB5806-1A	15
GeoB5806-1A	17
GeoB5806-1A	19
GeoB5806-1A	21
GeoB5806-1A	23
GeoB5806-1A	25
GeoB5806-1A	27
GeoB5806-1A	29
GeoB5806-1A	31
GeoB5806-1A	33
GeoB5806-1A	35
GeoB5806-1A	37
GeoB5836-2	1	5.5846	-36.8884	0.0566	0.134108
GeoB5836-2	3	6.1278	-29.8658	-0.00737441	0.0866767
GeoB5836-2	5		-27.191		0.149942
GeoB5836-2	7	5.4268	-27.564	-0.00187973	0.13
GeoB5836-2	9		-26.236		0.101
GeoB5836-2	11		-28.181		0.075
GeoB5836-2	13	2.3458	-27.231	0.0365922	0.108
GeoB5836-2	15		-25.08		0.13
GeoB5836-2	17		-26.102		0.098
GeoB5836-2	19	3.9062	-26.789	-0.0382517	0.102
GeoB5836-2	21		-26.832		0.125
GeoB5836-2	23		-24.219		0.148
GeoB5836-2	25		-26.173		0.124133
GeoB5836-2	27		-26.9376		0.120288
GeoB5836-2	29		-24.3974		0.123631
GeoB5836-2	31		-27.1688		0.117173
GeoB5836-2	33		-26.786		0.125693
GeoB5836-2	35		-28.2428		0.122445
GeoB5836-2	37	1.1524	-27.362	0.0467938	0.129
GeoB5836-2	39	3.792		0.027168
GeoB5836-2	41
GeoB5844-1	0.5	17.38		-0.02
GeoB5844-1	1.5
GeoB5844-1	2.5
GeoB5844-1	3.5
GeoB5844-1	4.5
GeoB5844-1	5.5
GeoB5844-1	6.5
GeoB5844-1	7.5
GeoB5844-1	8.5
GeoB5844-1	9.5	18.478		-0.003
GeoB5844-1	10.5
GeoB5844-1	11.5
GeoB5844-1	12.5
GeoB5844-1	13.5
GeoB5844-1	14.5
GeoB5844-1	15.5
GeoB5844-1	16.5
GeoB5844-1	17.5
GeoB5844-1	18.5
GeoB5844-1	20.5	18.7352		-0.012688
GeoB5844-1	21.5
GeoB5844-1	22.5
GeoB5844-1	23.5
GeoB5844-1	24.5
GeoB5844-1	25.5	20.3042		0.0489431
GeoB5844-1	26.5
GeoB5844-1	27.5
GeoB5844-1	28.5
GeoB5844-1	29.5	18.6058		0.0340649
